# Supplementary material for: Exploration of Potential Ewing Sarcoma Drugs from FDA-Approved Pharmaceuticals through Computational Drug Repositioning, Pharmacogenomics, Molecular Docking, and MD Simulation Studies
Source: PubMed Central journal article supplement — ACS Omega. 2022 Jun 1;7(23):19243–60. doi: 10.1021/acsomega.2c00518 (PMC9202290; doi:10.1021/acsomega.2c00518), 2022-06-01
Supplement: ao2c00518_si_001.pdf [file ao2c00518_si_001.pdf]

## Supplementary data

### Exploration of potential Ewing's sarcoma drugs from FDA approved pharmaceuticals through computational drug repositioning, pharmacogenomics, molecular docking, and MD simulation studies

Mubashir Hassan<sup>1,3\*</sup>, Muhammad Yasir<sup>1</sup>, Saba Shahzadi<sup>2</sup>, Andrzej Kloczkowski<sup>3,4\*</sup>

<sup>1</sup>Institute of Molecular Biology and Biotechnology, The University of Lahore (Defense Road Campus), Lahore, Pakistan.

<sup>2</sup>Institute of Molecular Sciences and Bioinformatics (IMSB), Nisbet Road, Lahore, Pakistan

<sup>3</sup>The Steve and Cindy Rasmussen Institute for Genomic Medicine at Nationwide Children's Hospital, Columbus, OH 43205, USA

<sup>4</sup>Department of Pediatrics, The [Ohio State University](http://www.ohio-state.edu), Columbus, Ohio 43205, USA

#### Correspondence

##### Dr. Mubashir Hassan

<sup>1</sup>Institute of Molecular Biology and Biotechnology, The University of Lahore (Defense Road Campus), Lahore, Pakistan. The Steve and Cindy Rasmussen Institute for Genomic Medicine, Nationwide Children Hospital, Columbus, Ohio 43205, USA

**Emails:** [mubashirhassan\\_gcul@yahoo.com](mailto:mubashirhassan_gcul@yahoo.com) & [Mubasher.Hassan@nationwidechildrens.org](mailto:Mubasher.Hassan@nationwidechildrens.org)

##### Prof. Andrzej Kloczkowski

The Steve and Cindy Rasmussen Institute for Genomic Medicine, Nationwide Children Hospital & Department of Pediatrics, The Ohio State University, Columbus, Ohio 43205, USA

**Email:** [Andrzej.Kloczkowski@nationwidechildrens.org](mailto:Andrzej.Kloczkowski@nationwidechildrens.org)

**Table S1.** Screened drug and their FDA status

| Accession No | Generic name            | Score | Approved | Investigational | Experimental |
|--------------|-------------------------|-------|----------|-----------------|--------------|
| DB06589      | Pazopanib               | 0.998 | +        | -               | -            |
| DB01394      | Colchicine              | 0.022 | +        | -               | -            |
| DB00806      | Pentoxifylline          | 0.018 | +        | +               | -            |
| DB00862      | Vardenafil              | 0.018 | +        | -               | -            |
| DB01113      | Papaverine              | 0.016 | +        | +               | -            |
| DB08911      | Trametinib              | 0.016 | +        | -               | -            |
| DB08873      | Boceprevir              | 0.015 | +        | -               | -            |
| DB00450      | Droperidol              | 0.015 | +        | -               | -            |
| DB00338      | Omeprazole              | 0.014 | +        | +               | -            |
| DB00869      | Dorzolamide             | 0.014 | +        |                 | -            |
| DB01029      | Irbesartan              | 0.014 | +        | +               | -            |
| DB08822      | Azilsartan<br>medoxomil | 0.013 | +        | +               | -            |
| DB00203      | Sildenafil              | 0.013 | +        | +               | -            |
| DB01349      | Tasosartan              | 0.013 |          |                 | +            |
| DB00736      | Esomeprazole            | 0.012 | +        | +               | -            |
| DB00820      | Tadalafil               | 0.011 | +        | +               | -            |
| DB01336      | Metocurine              | 0.010 | +        | -               | -            |
| DB00757      | Dolasetron              | 0.010 | +        | +               | -            |
| DB08965      | Fusafungine             | 0.010 | +        | -               | -            |
| DB06802      | Nepafenac               | 0.010 | +        | +               | -            |
| DB06605      | Apixaban                | 0.010 | +        | -               | -            |
| DB06751      | Drotaverine             | 0.010 | +        | +               | -            |
| DB01247      | socarboxazid            | 0.010 | +        | -               | -            |
| DB00705      | Delavirdine             | 0.010 | +        | -               | -            |
| DB01298      | Sulfacytine             | 0.009 | +        | -               | -            |
| DB01342      | Forasartan              | 0.009 | -        | -               | +            |
| DB01482      | Fenethylline            | 0.009 | -        | -               | +            |
| DB01039      | Fenofibrate             | 0.009 | +        | -               | -            |
| DB00421      | Spirolactone            | 0.008 | +        | -               | -            |
| DB00589      | Lisuride                | 0.008 | +        | +               | -            |
| DB00490      | Buspirone               | 0.008 | +        | +               | -            |
| DB00202      | Succinylcholine         | 0.008 | +        | -               | -            |
| DB08828      | Vismodegib              | 0.008 | +        | +               | -            |
| DB01122      | Ambenonium              | 0.008 | +        | -               | -            |
| DB06288      | Amisulpride             | 0.008 | +        | +               | -            |
| DB00527      | Cinchocaine             | 0.008 | +        | -               | -            |
| DB08811      | Tofisopam               | 0.008 | -        | -               | +            |
| DB00808      | Indapamide              | 0.008 | +        | -               | -            |
| DB06414      | Etravirine              | 0.008 | +        | -               | -            |
| DB08983      | Etofibrate              | 0.008 | -        | -               | +            |
| DB09020      | Bisacodyl               | 0.008 | +        | -               | -            |

|          |                            |       |   |   |   |
|----------|----------------------------|-------|---|---|---|
| DB06209  | Prasugrel                  | 0.008 | + | - | - |
| DB01026  | Ketoconazole               | 0.008 | + | + | - |
| DB01138  | Sulfinpyrazone             | 0.007 | + | - | - |
| DB01411  | Pranlukast                 | 0.007 | - | + | - |
| DB00745  | Modafinil                  | 0.007 | + | + | - |
| DB01065  | Melatonin                  | 0.007 | + | - | - |
| DB00343  | Diltiazem                  | 0.007 | + | + | - |
| DB00843  | Donepezil                  | 0.007 | + | - | - |
| DB00662  | Trimethobenzamide          | 0.007 | + | + | - |
| DB08974  | Flubendazole               | 0.007 | - | - | + |
| DB01168  | Procarbazine               | 0.007 | + | + | - |
| DB00546, | Adinazolam                 | 0.007 | - | - | + |
| DB00706  | Tamsulosin                 | 0.007 | + | + | - |
| DB01035  | Procainamide               | 0.007 | + | - | - |
| DB01233  | Metoclopramide             | 0.007 | + | + | - |
| DB00962  | Zaleplon                   | 0.007 | + | + | - |
| DB01325  | Quinethazone               | 0.007 | + | - | - |
| DB00980  | Ramelteon                  | 0.007 | + | + | - |
| DB00214  | Torasemide                 | 0.007 | + | - | - |
| DB00280  | Disopyramide               | 0.007 | + | - | - |
| DB00426  | Famciclovir                | 0.007 | + | + | - |
| DB08982  | Etozoline                  | 0.006 | - | - | + |
| DB00981  | Physostigmine              | 0.006 | + | + | - |
| DB01337  | Pancuronium                | 0.006 | + |   | - |
| DB01420  | Testosterone<br>Propionate | 0.006 | + | + | - |
| DB00486  | Nabilone                   | 0.006 | + | + | - |
| DB00480  | Lenalidomide               | 0.006 | + | - | - |
| DB06729  | Sulfaphenazole             | 0.006 | + | - | - |
| DB09003  | Clocapramine               | 0.006 | - | - | + |
| DB00496  | Darifenacin                | 0.006 | + | + | - |
| DB01238  | Aripiprazole               | 0.006 | + | + | - |
| DB01153  | Sertaconazole              | 0.006 | + | + | - |
| DB06691  | Mepyramine                 | 0.006 | + | - | - |
| DB00637  | Astemizole                 | 0.006 | + | - | - |
| DB00643  | Mebendazole                | 0.006 | + | - | - |
| DB00972  | Azelastine                 | 0.006 | + | - | - |
| DB08810  | Cinitapride                | 0.006 | - | + | - |
| DB00391  | Sulpiride                  | 0.006 | + | + | - |
| DB00721  | Procaine                   | 0.006 | + | + | - |
| DB01161  | Chloroprocaine             | 0.006 | + | - | - |
| DB00613  | Amodiaquine                | 0.006 | + | + | - |
| DB00807  | Proparacaine               | 0.006 | + | - | - |
| DB00892  | Oxybuprocaine              | 0.006 | + | + | - |
| DB00812  | Phenylbutazone             | 0.006 | + | - | - |

|         |                             |       |   |   |   |
|---------|-----------------------------|-------|---|---|---|
| DB00395 | Carisoprodol                | 0.006 | + | - | - |
| DB01339 | Vecuronium                  | 0.005 | + | + | - |
| DB00603 | Medroxyprogesterone Acetate | 0.005 | + | + | - |
| DB00984 | Nandrolone phenpropionate   | 0.005 | + | + | - |
| DB00758 | Clopidogrel                 | 0.005 | + | - | - |
| DB00637 | Astemizole                  | 0.006 | + | + | - |
| DB00562 | Benzthiazide                | 0.005 | + | - | - |
| DB00310 | Chlorthalidone              | 0.005 | + | - | - |
| DB00837 | Progabide                   | 0.005 | - | - | + |
| DB00656 | Trazodone                   | 0.005 | + | + | - |
| DB01127 | Econazole                   | 0.005 | + | - | - |
| DB01110 | Miconazole                  | 0.005 | + | + | - |
| DB08943 | Isoconazole                 | 0.005 | + | - | - |
| DB04880 | Enoximone                   | 0.005 | + | + | - |
| DB06150 | Sulfadimethoxine            | 0.005 | + | - | - |
| DB06594 | Agomelatine                 | 0.005 | + | + | - |

**Table S2.** Virtual screening of drugs using PyRx

| <b>Docking Complexes</b> | <b>Drugs</b>      | <b>Binding Affinity (Kcal/mol)</b> | <b>Docking Complexes</b> | <b>Drugs</b>              | <b>Binding Affinity (Kcal/mol)</b> |
|--------------------------|-------------------|------------------------------------|--------------------------|---------------------------|------------------------------------|
| DB00395                  | Carisoprodol      | -4.5                               | DB00862                  | Vardenafil                | -6.5                               |
| DB00721                  | Procaine          | -4.7                               | DB09020                  | Bisacodyl                 | -6.6                               |
| DB01161                  | Chlorprocaine     | -4.8                               | DB06594                  | Agomelatine               | -6.6                               |
| DB00807                  | Proparacaine      | -4.9                               | DB06414                  | Etravirine                | -6.6                               |
| DB00202                  | Succinylcholine   | -4.9                               | DB00613                  | Amodiaquine               | -6.6                               |
| DB01035                  | Procainamide      | -5                                 | DB00214                  | Torasemide                | -6.6                               |
| DB00892                  | Oxybuprocaine     | -5.3                               | DB00203                  | Sildenafil                | -6.6                               |
| DB00662                  | Trimethobenzamide | -5.3                               | DB08810                  | Cinitapride               | -6.7                               |
| DB01233                  | Metoclopramide    | -5.4                               | DB00984                  | Nandrolone phenpropionate | -6.7                               |
| DB00426                  | Famciclovir       | -5.4                               | DB00656                  | Trazodone                 | -6.7                               |
| DB04880                  | Enoximone         | -5.5                               | DB00962                  | Zaleplon                  | -6.8                               |
| DB00745                  | Modafinil         | -5.5                               | DB00843                  | Donepezil                 | -6.8                               |
| DB01298                  | Sulfacytine       | -5.6                               | DB01238                  | Aripiprazole              | -6.9                               |
| DB01065                  | Melatonin         | -5.6                               | DB01127                  | Econazole                 | -6.9                               |
| DB00806                  | Pentoxifylline    | -5.6                               | DB01110                  | Miconazole                | -6.9                               |
| DB00706                  | Tamsulosin        | -5.6                               | DB01138                  | Sulfinpyrazone            | -7                                 |
| DB08943                  | Isoconazole       | -5.8                               | DB00808                  | Indapamide                | -7                                 |
| DB06729                  | Sulfaphenazole    | -5.8                               | DB08974                  | Flubendazole              | -7.1                               |
| DB06751                  | Drotaverine       | -5.9                               | DB00280                  | Disopyramide              | -7.1                               |

|         |                  |      |         |                |      |
|---------|------------------|------|---------|----------------|------|
| DB06288 | Amisulpride      | -5.9 | DB01122 | Ambenonium     | -7.2 |
| DB01325 | Quinethazone     | -5.9 | DB01029 | Irbesartan     | -7.2 |
| DB00812 | Phenylbutazone   | -5.9 | DB00837 | Progabide      | -7.2 |
| DB00391 | Sulpiride        | -5.9 | DB00450 | Droperidol     | -7.2 |
| DB06150 | Sulfadimethoxine | -6   | DB00643 | Mebendazole    | -7.4 |
| DB01247 | Isocarboxazid    | -6   | DB00579 | Mazindol       | -7.4 |
| DB01113 | Papaverine       | -6   | DB00705 | Delavirdine    | -7.5 |
| DB00480 | Lenalidomide     | -6   | DB06605 | Apixaban       | -7.6 |
| DB06802 | Nepafenac        | -6.1 | DB06589 | Pazopanib      | -7.6 |
| DB01394 | Colchicine       | -6.1 | DB08828 | Vismodegib     | -7.7 |
| DB08811 | Tofisopam        | -6.2 | DB01026 | Ketoconazole   | -7.7 |
| DB01168 | Procarbazine     | -6.2 | DB00546 | Adinazolam     | -7.7 |
| DB01153 | Sertaconazole    | -6.2 | DB01342 | Forasartan     | -7.8 |
| DB00527 | Cinchocaine      | -6.2 | DB00310 | Chlorthalidone | -7.8 |
| DB06209 | Prasugrel        | -6.3 | DB01411 | Pranlukast     | -8   |
| DB06691 | Mepyramine       | -6.4 | DB09003 | Clocapramine   | -8.1 |
| DB00736 | Esomeprazole     | -6.4 | DB00637 | Astemizole     | -8.3 |
| DB00338 | Omeprazole       | -6.4 | DB00972 | Azelastine     | -8.7 |
| DB00496 | Darifenacin      | -9.2 | DB01349 | Tasosartan     | -8.9 |
